# Supplementary material for: Synthesis of 3-amino-thiochromanes from 4-benzyl 2-thiazolines, via an unprecedented intramolecular electrophilic aromatic substitution
Source: Royal Society of Chemistry journal article supplement (doi:10.1039/c003050c), 2010-01-01

## Supporting Information

# Synthesis of 3-amino-thiochromanes from 4-benzyl 2-thiazolines, via an unprecedented intramolecular electrophilic aromatic substitution

Guillaume Mercey,<sup>a</sup> Remi Legay,<sup>a</sup> Jean-François Lohier,<sup>a</sup> Jana Sopkova-de Oliveira Santos,<sup>b</sup>  
Jocelyne Levillain,<sup>a</sup> Annie-Claude Gaumont,<sup>a</sup> and Mihaela Gulea<sup>a\*</sup>

<sup>a</sup>Laboratoire de Chimie Moléculaire et Thioorganique, UMR CNRS 6507, INC3M, FR 3038, ENSICAEN, Université de Caen  
Basse-Normandie, 6, Bd. Maréchal Juin 14050 Caen, France.

[mihaela.gulea@ensicaen.fr](mailto:mihaela.gulea@ensicaen.fr)

<sup>b</sup>Laboratoire de Cristallographie, Centre d'Etudes et de Recherche sur le Médicament de Normandie, EA 4258, FR CNRS  
3038 INC3M, Université de Caen Basse-Normandie, Bd. Becquerel, 14032 Caen.

### General Information:

NMR spectra were recorded on a Bruker DRX 400 spectrometer. Chemical shifts ( $\delta$ ) are reported in ppm (s = singlet, d = doublet, t = triplet, m = multiplet, br = broad) and are indicated in ppm using TMS as internal standard. Coupling constants ( $J$ ) are given in Hertz.

Mass spectra were obtained on a GC/MS Saturn 2000 spectrometer and HRMS on a Waters QTOF micro spectrometer. IR spectra were recorded with a Perkin Elmer 16 PC FT-IR instrument. Analytical data were obtained using a THERMOQUEST NA 2500 instrument. Optical rotations were measured on a Perkin-Elmer 241 polarimeter.

X-ray diffraction experiments were performed with graphite-monochromatized MoK $\alpha$  radiation on a Bruker-Nonius Kappa CCD area detector diffractometer.

**Preparation of the starting materials:** Thiazolines **1a** and **1b** were prepared according to: G. Mercey, D. Brégeon, A.-C. Gaumont, J. Levillain, M. Gulea, *Tetrahedron Lett.*, 2008, **49**, 6553. Thiazolinium salts **4a-e** and disulfides **5b-d** were prepared according to: G. Mercey, J.-F. Lohier, A.-C. Gaumont, J. Levillain, M. Gulea, *Eur. J. Org. Chem.* 2009, 4357.

### Preparation of the 3-amino-thiochromanes **3a,b** and **6a-e**. *General procedure:*

1 mmol of starting material (thiazoline **3**, thiazolinium salt **4**, or disulfide **2** or **5**) was placed in aqueous 5N HCl (5 mL) and heated at 100°C, in air, until reaction completion. After

evaporation under vacuum, the residue was washed with acetone and the resulting solid filtrated and dried to afford the 3-amino-thiochromane as a hydrochloride.

### (S)-3-Aminothiochromane hydrochloride **3a**

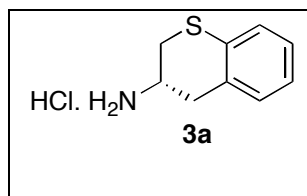

Prepared from thiazoline **1a** (150 mg, 0.86 mmol); reaction time = 5 days; yield = 86%.

Prepared from disulfide **2a** (50 mg, 0.28 mmol); reaction time = 4 days; yield = 88%.

Formula: C<sub>9</sub>H<sub>12</sub>NSCl

Molecular weight: 201.72 g.mol<sup>-1</sup>

Aspect: red powder

[ $\alpha$ ]<sub>D</sub><sup>20</sup> - 17 (c = 0.45, MeOH); for the (*R*)-**3a**: [ $\alpha$ ]<sub>D</sub><sup>20</sup> + 18 (c = 1.00, MeOH)

mp 214 °C

<sup>1</sup>H NMR (250 MHz, D<sub>2</sub>O)  $\delta$  (ppm) 2.96 (dd, *J* = 6.1, 17.1 Hz, 1H), 3.08 (dd, *J* = 6.4, 13.6 Hz, 1H), 3.20 (dd, *J* = 4.3, 17.1 Hz, 1H), 3.33 (dd, *J* = 3.1, 13.6 Hz, 1H), 4.02 – 4.09 (m, 1H), 7.07 – 7.17 (m, 4H).

<sup>13</sup>C NMR (63 MHz, D<sub>2</sub>O)  $\delta$  (ppm) 28.8, 32.1, 44.7, 125.5, 126.5, 127.6, 129.0, 130.2, 131.1.

HMRS (ESI) calcd. for C<sub>9</sub>H<sub>12</sub>NS, 166.0690; found, 166.0698.

Elemental analysis : Calc. for C<sub>9</sub>H<sub>12</sub>NSCl + 0.3 HCl: H 5.83, C 50.83, N 6.59; found: H 5.69, C 50.77, N 6.65.

See reference for the racemic compound: RN [103659-74-1], B. Trivedi, Eur. Pat. Appl. (1986), EP 181109 A2 19860514.

### X-ray crystallographic data

Single crystals of aminothiochromane (*S*)-**3a** suitable for X-ray crystallographic analysis were obtained by slow evaporation of methanol. X-ray diffraction experiments for monocystal of **3a** were performed at 291 K with graphite-monochromatized Mo K $\alpha$  radiation on an Bruker–Nonius Kappa CCD area detector diffractometer. Formula C<sub>9</sub>H<sub>12</sub>CINS, *M* = 201.71, crystal system orthorhombic, space group *P*2<sub>1</sub>2<sub>1</sub>2<sub>1</sub> (no. 19), *a* = 5.3668(11) Å, *b* = 6.2152(12) Å, *c* = 29.035(6) Å, *U* = 968.5(3) Å<sup>3</sup>, *T* = 291 K, *Z* = 4, calculated density = 1.383 g/cm<sup>3</sup>,  $\mu$  = 0.55 mm<sup>-1</sup>, 15838 reflections measured, 2871 unique (*R*<sub>int</sub> = 0.069) which were used in all calculations. The final *wR*(*F*<sub>2</sub>) was 0.141 (all data).

Single crystals of aminothiochromane (*R*)-**3a** suitable for X-ray crystallographic analysis were obtained by slow evaporation of methanol. X-ray diffraction experiments for monocrystal of **3a** were performed at 291 K with graphite-monochromatized Mo K $\alpha$  radiation on an Bruker–Nonius Kappa CCD area detector diffractometer. Formula C<sub>9</sub>H<sub>12</sub>ClNS, *M* = 201.71, crystal system orthorhombic, space group *P*2<sub>1</sub>2<sub>1</sub>2<sub>1</sub> (no. 19), *a* = 5.3436(12) Å, *b* = 6.2291(19) Å, *c* = 29.214(8) Å, *U* = 972.4(4) Å<sup>3</sup>, *T* = 291 K, *Z* = 4, calculated density = 1.378 g/cm<sup>3</sup>,  $\mu$  = 0.55 mm<sup>-1</sup>, 39910 reflections measured, 4476 unique (*R*<sub>int</sub> = 0.021) which were used in all calculations. The final *wR*(*F*<sub>2</sub>) was 0.085 (all data).

### (*S*)-3-Amino-7-hydroxythiochromane hydrochloride **3b**

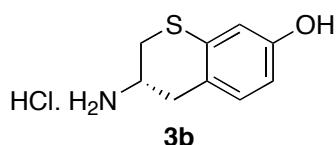

Prepared from thiazoline **1b** (150 mg, 0.86 mmol); reaction time = 10 days; yield = 36%.

Formula: C<sub>9</sub>H<sub>12</sub>NOSCl

Molecular weight: 217.72 g.mol<sup>-1</sup>

Aspect: red powder

[ $\alpha$ ]<sub>D</sub><sup>20</sup> + 61 (*c* = 0.23, MeOH)

<sup>1</sup>H NMR (500 MHz, D<sub>2</sub>O)  $\delta$  (ppm) 2.78 (dd, *J* = 5.2, 13.5 Hz, 1H), 2.96 (dd, *J* = 4.5, 10.5 Hz, 1H), 2.99 (dd, *J* = 3.8, 13.5 Hz, 1H), 3.20 (dd, *J* = 2.5, 10.5 Hz, 1H), 3.90 – 3.95 (m, 1H), 6.47 – 6.90 (m, 4H).

<sup>13</sup>C NMR (125 MHz, D<sub>2</sub>O) :  $\delta$  (ppm) 28.6, 31.3, 44.7, 112.4, 113.0, 120.6, 131.2, 132.2, 154.4.

HMRS (ESI) calcd. for C<sub>9</sub>H<sub>12</sub>NOS, 182.0640; found, 182.0646.

### (*S*)-3-(Methylamino)thiochromane hydrochloride **6a**

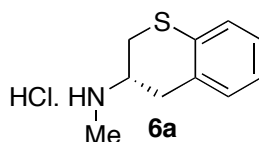

Prepared from thiazolinium salt **4a** (50 mg, 0.08 mmol); reaction time = 5 days; yield = 69%.

Formula: C<sub>10</sub>H<sub>14</sub>NSCl

Molecular weight: 215.74 g.mol<sup>-1</sup>

Aspect: white powder

$[\alpha]_{\text{D}}^{20}$  - 36 (c = 0.10, MeOH)

mp 191 °C

$^1\text{H}$  NMR (400 MHz,  $\text{D}_2\text{O}$ )  $\delta$  (ppm) 2.74 (s, 3H), 3.05 (dd,  $J$  = 5.0, 17.3 Hz, 1H), 3.15 (dd,  $J$  = 5.8, 13.8 Hz, 1H), 3.23 (dd,  $J$  = 4.3, 17.3 Hz, 1H), 3.40 (dd,  $J$  = 3.1, 13.8 Hz, 1H), 3.89 – 3.95 (m, 1H), 7.07 – 7.17 (m, 4H).

$^{13}\text{C}$  NMR (125 MHz,  $\text{D}_2\text{O}$ )  $\delta$  (ppm) 27.2, 30.4, 30.6, 52.0, 125.5, 126.6, 127.7, 128.4, 130.3, 131.1.

HMRS (ESI) calc. for  $\text{C}_{10}\text{H}_{14}\text{NS}$ , 180.0847; found, 180.0847.

### (S)-3-(Butylamino)thiochromane hydrochloride **6b**

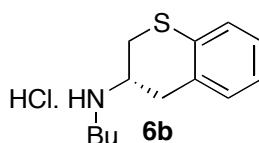

Prepared from thiazolinium salt **4b** (50 mg, 0.18 mmol); reaction time = 5 days; yield = 87%.

Prepared from disulfide **5b** (30 mg, 0.06 mmol); reaction time = 3 days; yield = 84%.

Formula:  $\text{C}_{13}\text{H}_{20}\text{NSCl}$

Molecular weight: 257.82  $\text{g}\cdot\text{mol}^{-1}$

Aspect: white powder

$[\alpha]_{\text{D}}^{20}$  + 26 (c = 0.40, MeOH).

mp 194 °C.

$^1\text{H}$  NMR (400 MHz,  $\text{D}_2\text{O}$ )  $\delta$  (ppm) 0.77 (t,  $J$  = 7.2 Hz, 3H), 1.25 (sx,  $J$  = 7.2 Hz, 2H), 1.48 – 1.58 (m, 2H), 2.94 (dd,  $J$  = 6.2, 17.3 Hz, 1H), 2.98 – 3.09 (m, 3H), 3.16 (dd,  $J$  = 4.5, 17.3 Hz, 1H), 3.27 (dd,  $J$  = 2.7, 13.6 Hz, 1H), 3.84 – 3.90 (m, 1H), 6.98 – 7.08 (m, 4H).

$^{13}\text{C}$  NMR (63 MHz,  $\text{D}_2\text{O}$ )  $\delta$  (ppm) 12.6, 19.2, 27.4, 31.0, 45.2, 51.3, 125.6, 126.6, 127.6, 129.0, 130.5, 131.0.

HMRS (ESI) calcd. for  $\text{C}_{13}\text{H}_{20}\text{NS}$ , 222.1316; found, 222.1326.

Elemental analysis : Calc. for  $\text{C}_{13}\text{H}_{20}\text{NSCl}$  + 1.4 HCl: H 6.98, C 50.55, N 4.53; found: H 7.00, C 50.29, N 4.63.

### (S)-3-(Benzylamino)thiochromane hydrochloride **6c**

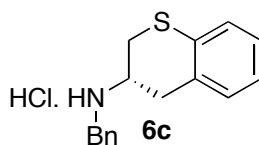

Prepared from thiazolinium salt **4c** (100 mg, 0.28 mmol); reaction time = 14 days; yield = 89%. Prepared from disulfide **5c** (25 mg, 0.07 mmol); reaction time = 4 days; yield = 98%.

Formula: C<sub>16</sub>H<sub>18</sub>NSCl

Molecular weight: 291.84 g.mol<sup>-1</sup>

Aspect: light blue powder

[ $\alpha$ ]<sub>D</sub><sup>20</sup> + 33 (c = 0.32, MeOH)

<sup>1</sup>H NMR (400 MHz, D<sub>2</sub>O)  $\delta$  (ppm) 3.04 (dd, *J* = 5.9, 17.1 Hz, 1H), 3.17 (ddd, *J* = 1.0, 6.7, 13.6 Hz, 1H), 3.25 (dd, *J* = 4.6, 17.1 Hz, 1H), 3.36 (dd, *J* = 2.8, 13.6 Hz, 1H), 3.96 – 4.01 (m, 1H), 4.27 – 4.37 (m, 2H), 7.08 – 7.16 (m, 4H), 7.44 (s, 5H).

<sup>13</sup>C NMR (63 MHz, D<sub>2</sub>O)  $\delta$  (ppm) 27.6, 31.1, 48.8, 51.0, 125.6, 126.7, 127.7, 129.0, 129.3, 129.8, 129.9, 130.3, 130.5, 131.0.

HMRS (ESI) calcd. for C<sub>16</sub>H<sub>18</sub>NS, 256.1160; found, 256.1154.

Elemental analysis : Calc. for C<sub>16</sub>H<sub>18</sub>NSCl + 2 HCl: H 5.53, C 52.68, N 3.84; found: H 5.01, C 52.31, N 3.83.

### (S)-2-(thiochromane-3)aminoacetic acid hydrochloride **6d**

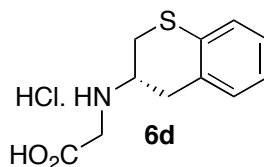

Prepared from thiazolinium salt **4d** (170 mg, 0.42 mmol); reaction time = 5 days; yield = 83%. Prepared from disulfide **5d** (100 mg, 0.28 mmol); reaction time = 4 days; yield = 68%.

Formula: C<sub>11</sub>H<sub>14</sub>NO<sub>2</sub>SCl

Molecular weight: 259.75 g.mol<sup>-1</sup>

Aspect: light brown powder

[ $\alpha$ ]<sub>D</sub><sup>20</sup> + 14.8 (c = 0.40, MeOH).

mp 209 °C.

<sup>1</sup>H NMR (400 MHz, D<sub>2</sub>O)  $\delta$  (ppm) 3.07 (dd, *J* = 6.4, 16.8 Hz, 1H), 3.17 (dd, *J* = 7.0, 13.9 Hz, 1H), 3.25 (dd, *J* = 4.0, 16.8 Hz, 1H), 3.36 (dd, *J* = 2.9, 13.9 Hz, 1H), 3.89 (AB, *J* = 16.8

Hz, 1H), 3.95 (AB,  $J = 16.8$  Hz, 1H), 4.01 – 4.07 (m, 1H), 7.07 – 7.11 (m, 1H), 7.12 – 7.17 (m, 3H).

$^{13}\text{C}$  NMR (63 MHz,  $\text{D}_2\text{O}$ )  $\delta$  (ppm) 27.6, 30.9, 45.8, 52.1, 125.6, 126.6, 127.7, 129.0, 130.4, 131.0, 169.4.

**Elemental analysis** : Calc. for  $\text{C}_{11}\text{H}_{14}\text{NSO}_2\text{Cl} + 0.6 \text{HCl}$ : H 5.23, C 46.91, N 4.97; found: H 5.23, C 46.78, N 5.20.

**(S)-3-(2-Hydroxyethyl)aminothiochromane hydrochloride 6e**

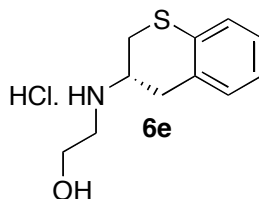

Prepared from thiazolinium salt **4e** (100 mg, 0.32 mmol); reaction time = 7 days; yield = 82%.

Formula:  $\text{C}_{11}\text{H}_{16}\text{NSCl}$

Molecular weight:  $245.77 \text{ g}\cdot\text{mol}^{-1}$

Aspect: light brown powder

$[\alpha]_{\text{D}}^{20} -1.1$  ( $c = 1.0$ , MeOH).

mp  $203 \text{ }^\circ\text{C}$ .

$^1\text{H}$  NMR (500 MHz,  $\text{D}_2\text{O}$ )  $\delta$  (ppm) 3.02 (dd,  $J = 6.0, 17.2$  Hz, 1H), 3.14 (dd,  $J = 6.7, 13.5$  Hz, 1H), 3.20 - 3.27 (m, 3H), 3.34 (dd,  $J = 3.0, 13.5$  Hz, 1H), 3.78 (t,  $J = 5.2$  Hz, 1H), 3.96 - 4.01 (m, 1H), 7.04 – 7.14 (m, 4H).

$^{13}\text{C}$  NMR (125 MHz,  $\text{D}_2\text{O}$ )  $\delta$  (ppm) 27.4, 31.0, 46.8, 51.5, 56.5, 125.6, 126.6, 127.6, 129.0, 130.4, 131.0.

**HMRS (ESI)** calc. for  $\text{C}_{11}\text{H}_{16}\text{NSO}$ , 210.0953; found, 210.0943.

**Elemental analysis** : Calc. for  $\text{C}_{11}\text{H}_{16}\text{NSOCl} + 2 \text{HCl}$ : H 5.69, C 41.46, N 4.40; found: H 5.62, C 41.29, N 4.55.

$^1\text{H}$  NMR and  $^{13}\text{C}$  NMR spectra of 3-amino-thiochromanes **3a,b** and **6a-e**:

**3a:**

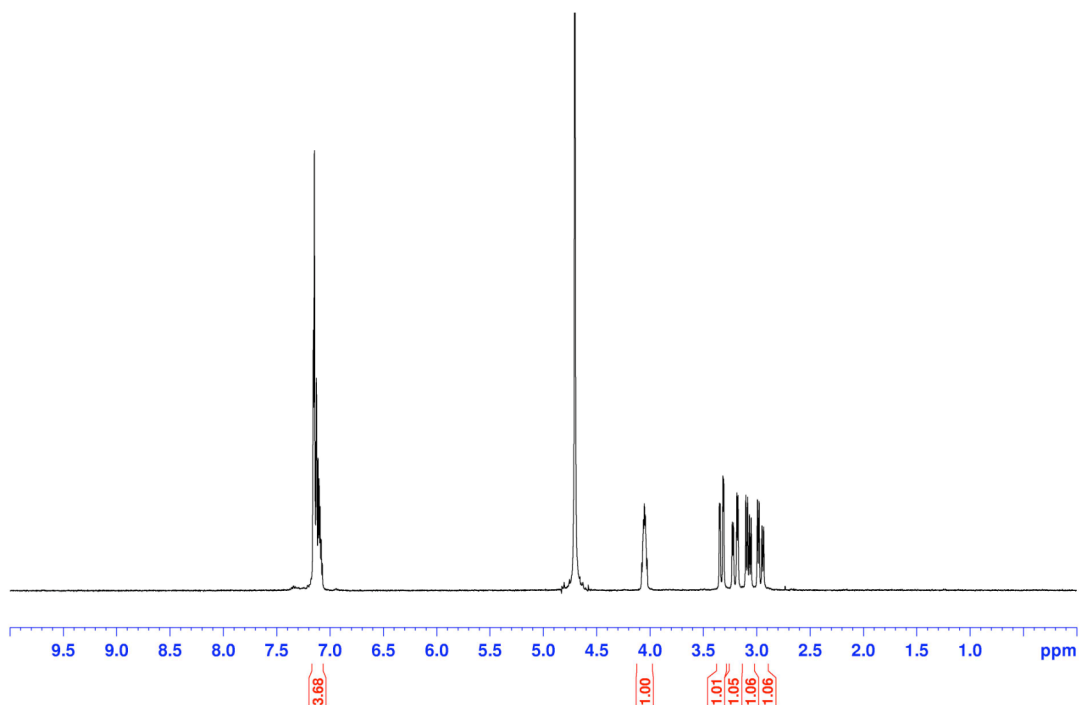

131.08  
130.23  
127.61  
126.52  
125.48

44.67

32.10

29.83

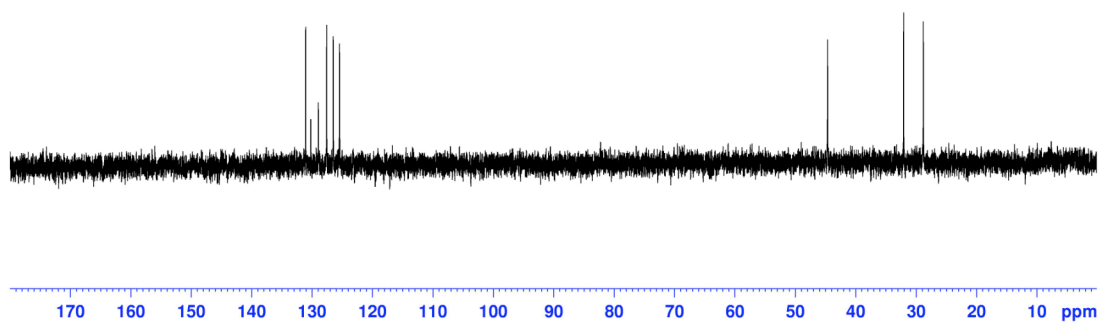

**3b:**

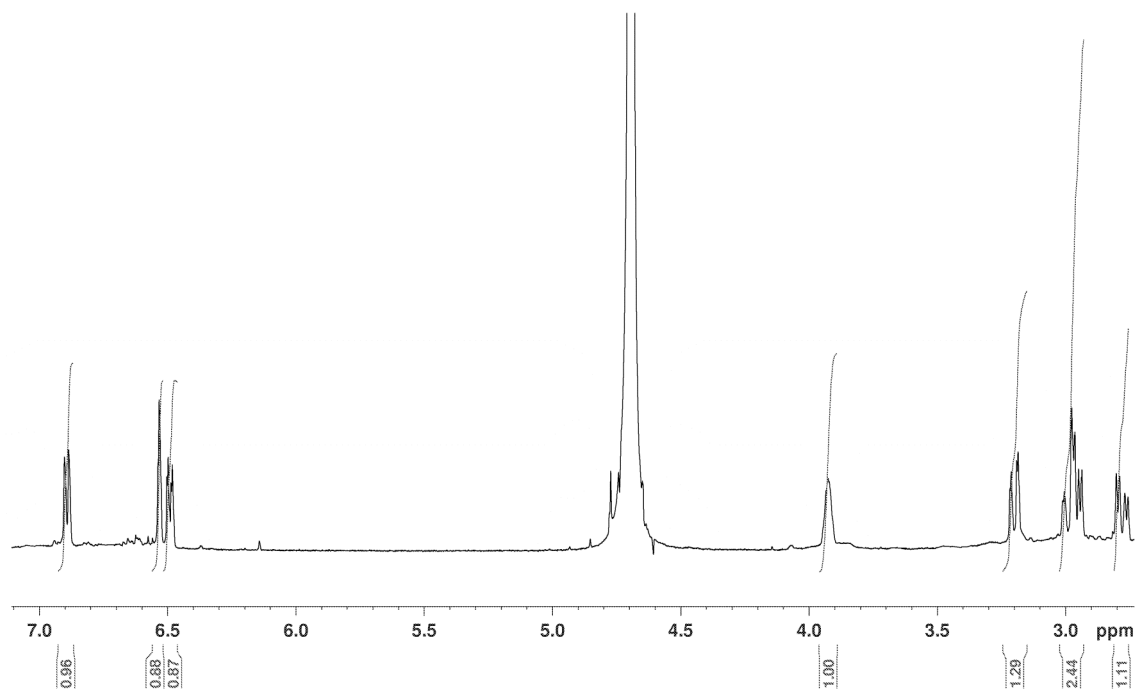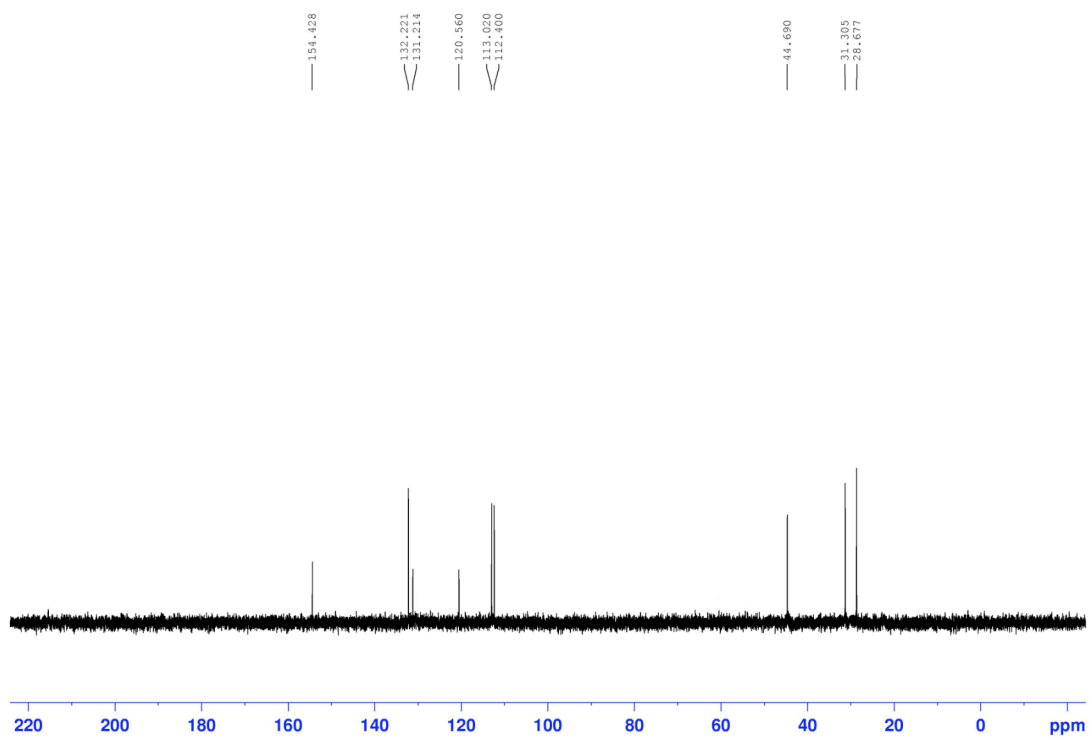



**6a:**

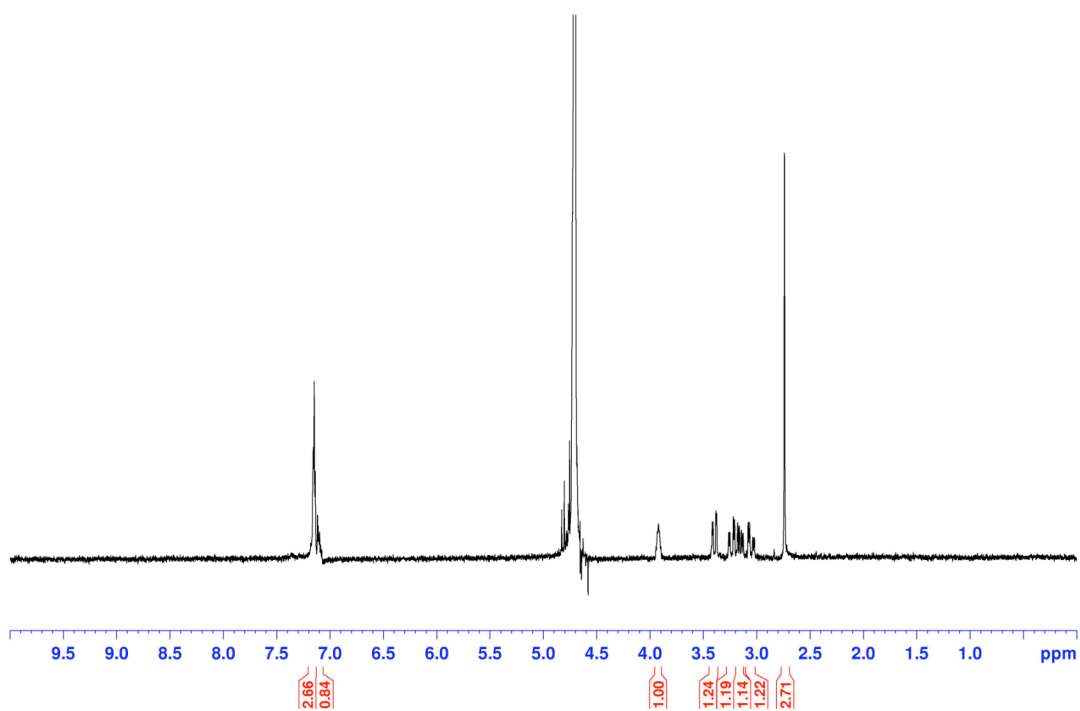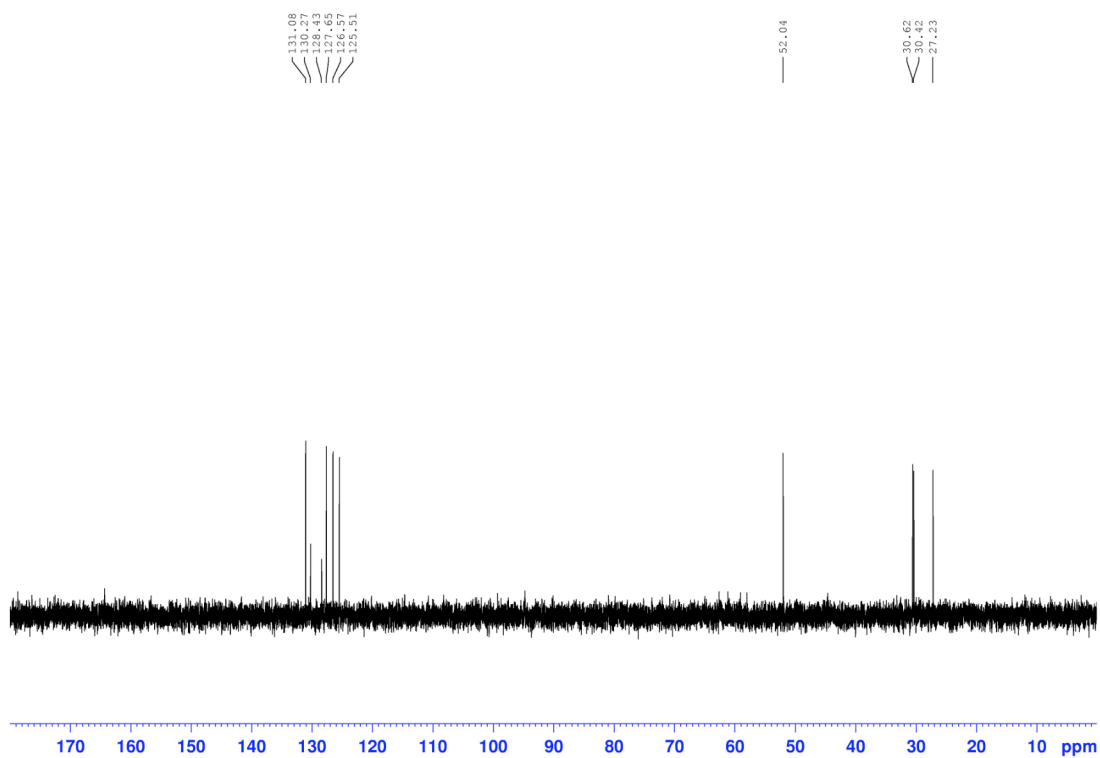

**6b:**

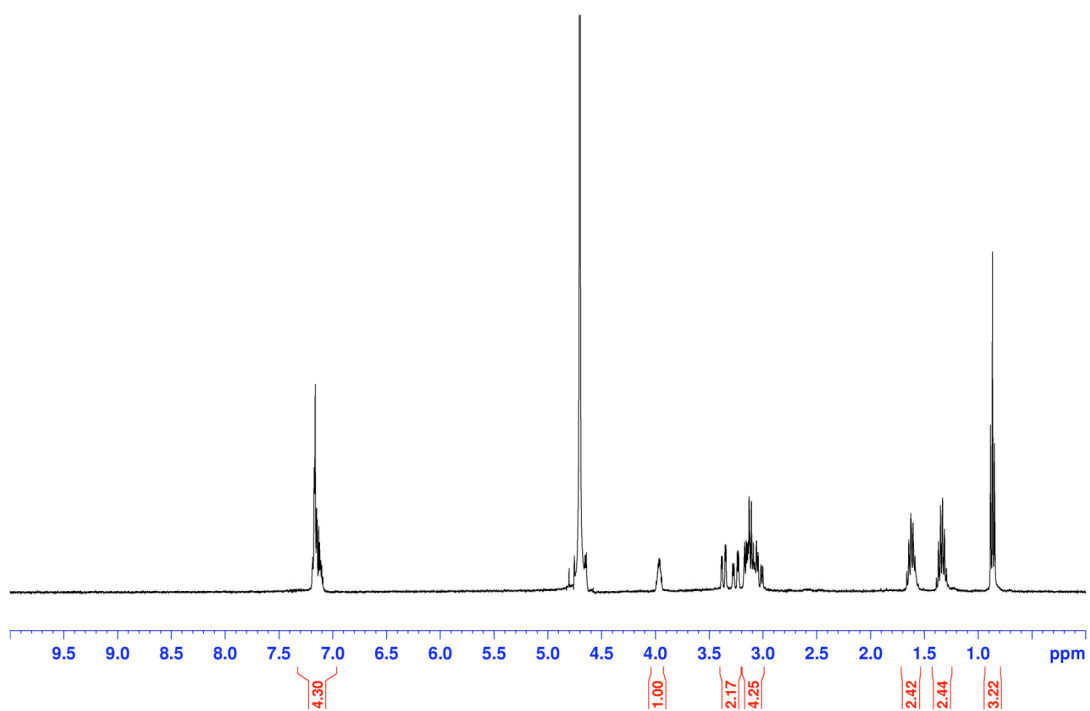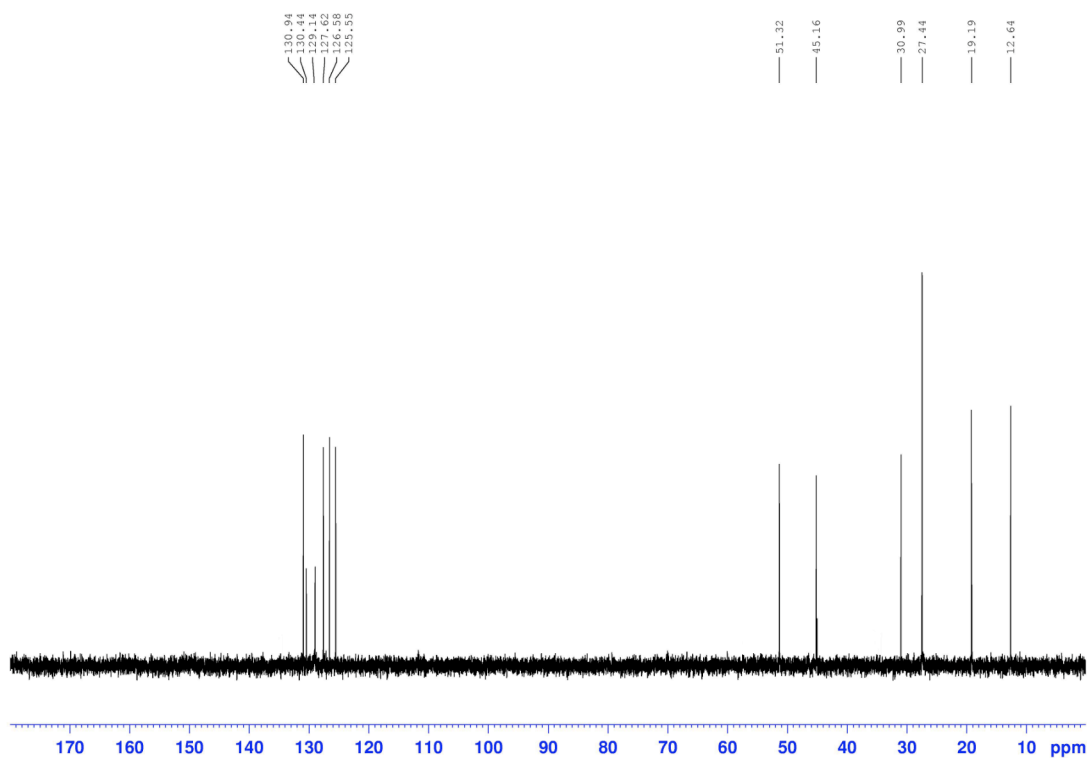

**6c:**

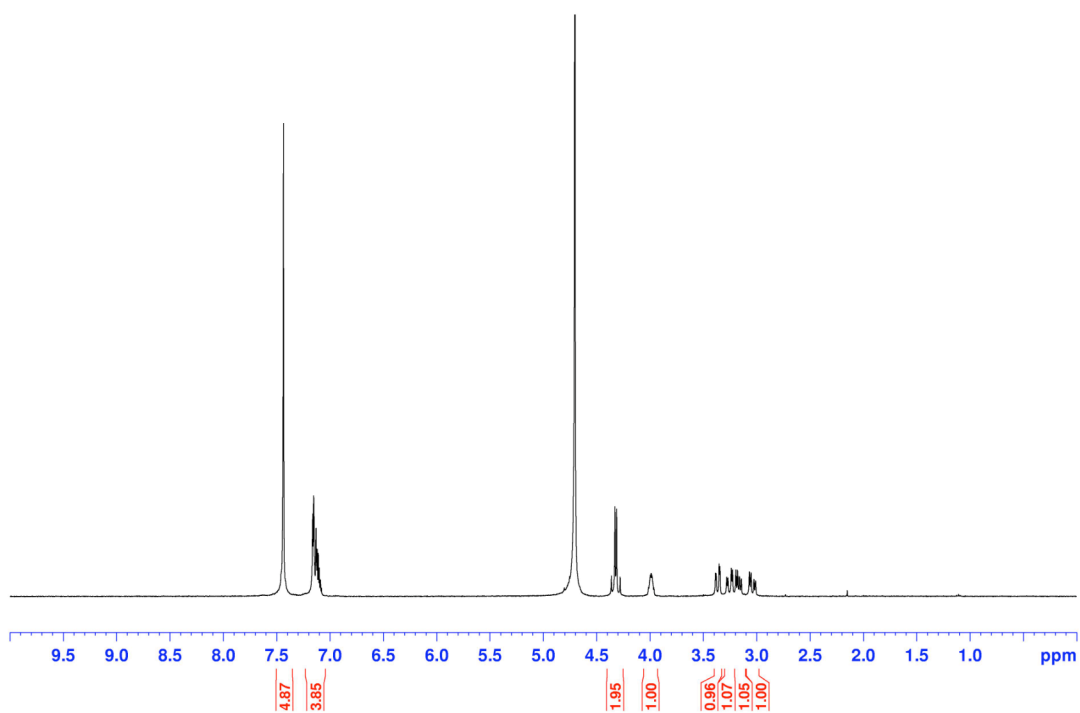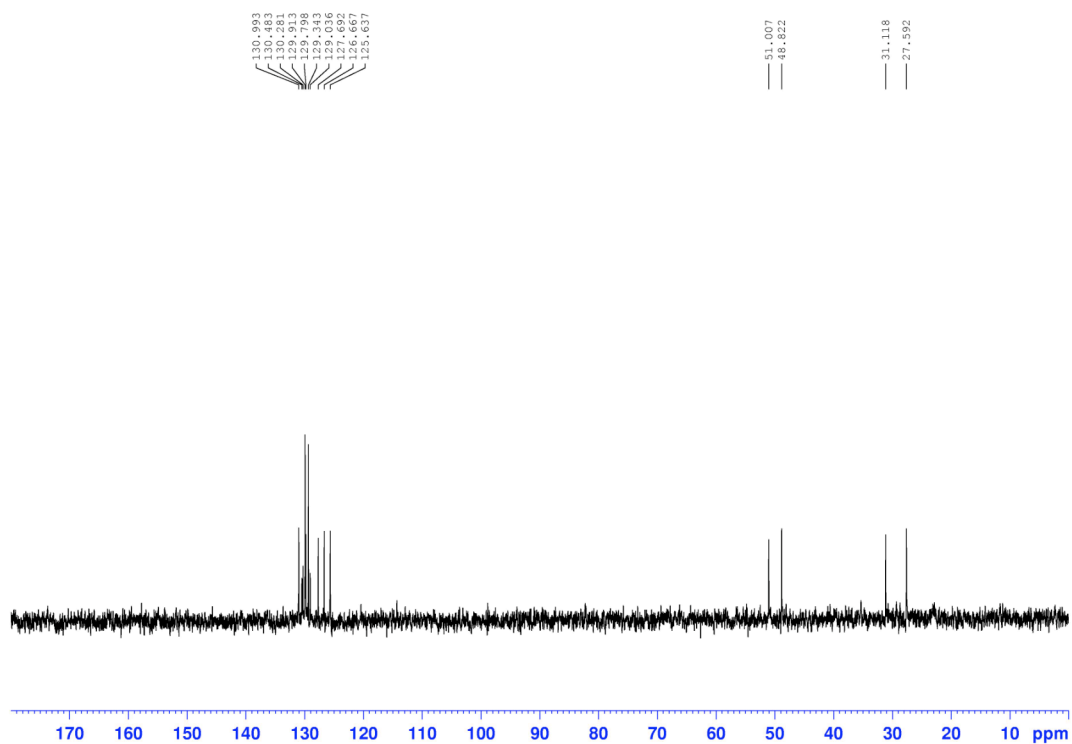

**6d:**

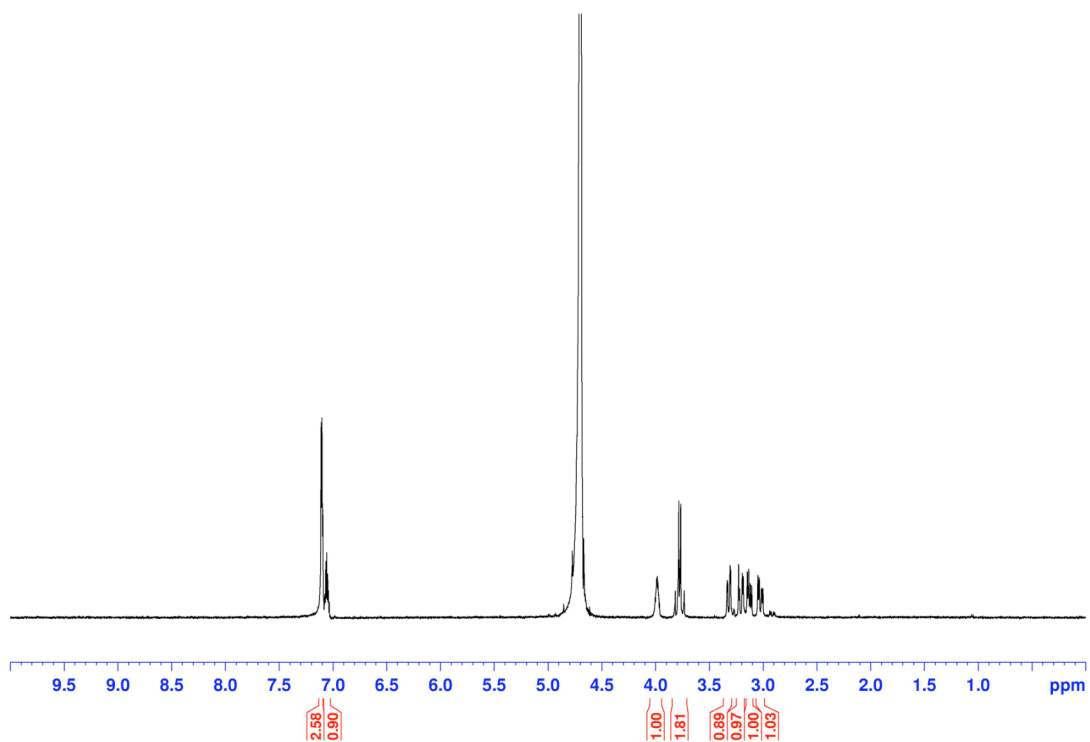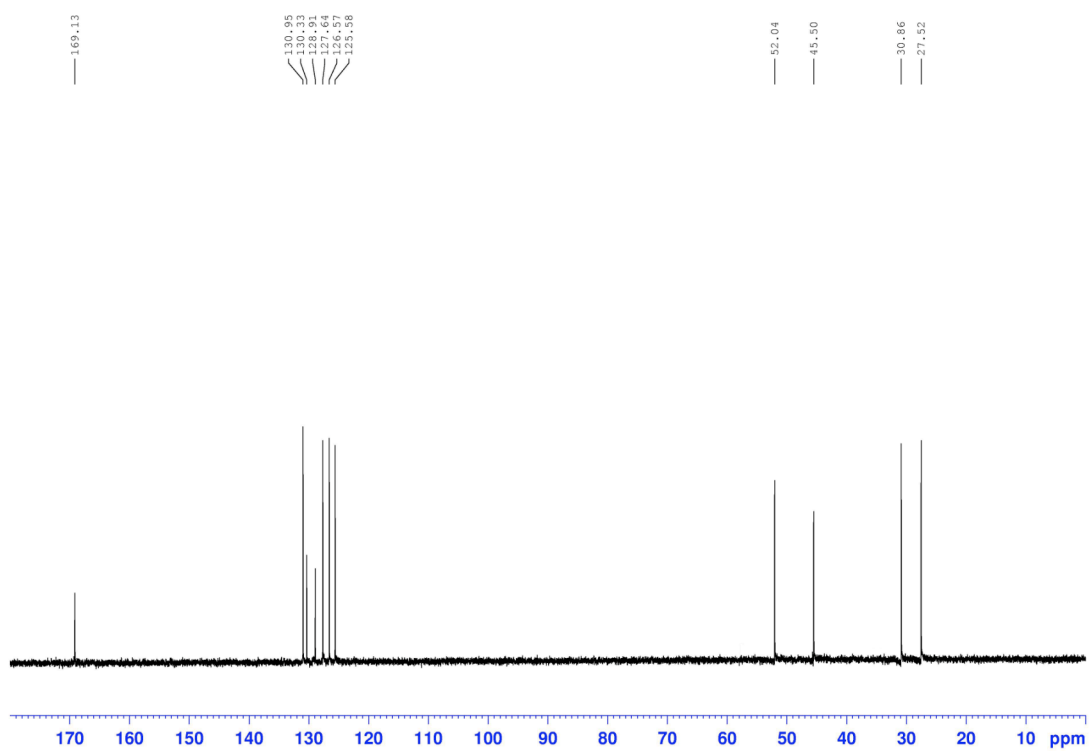

6e:

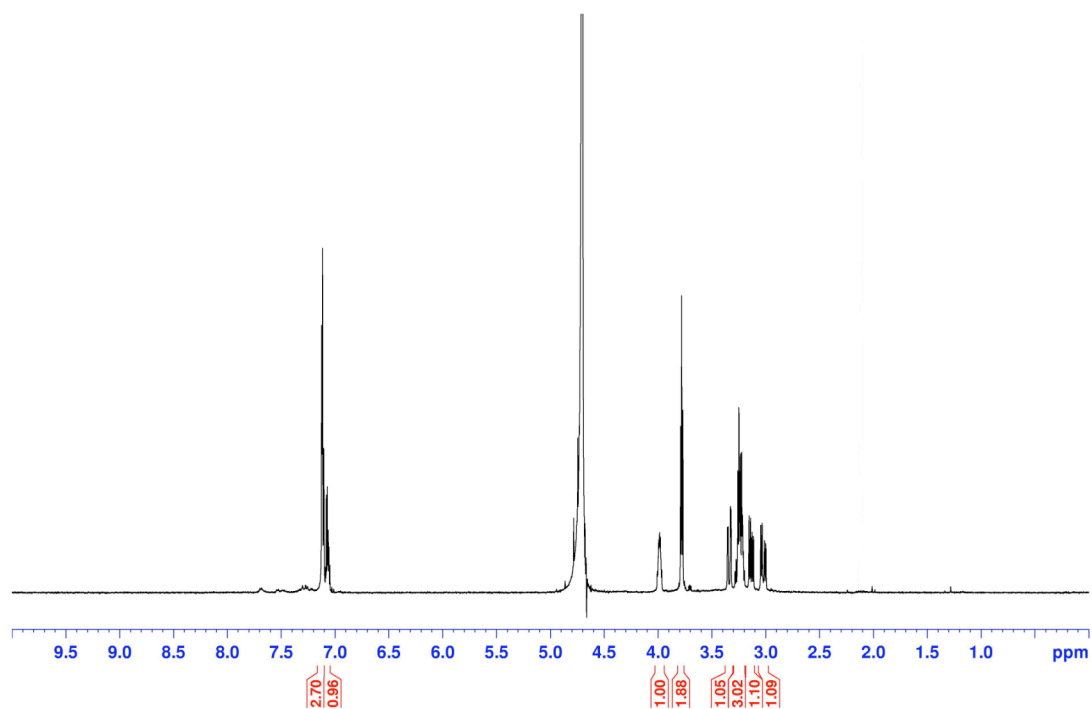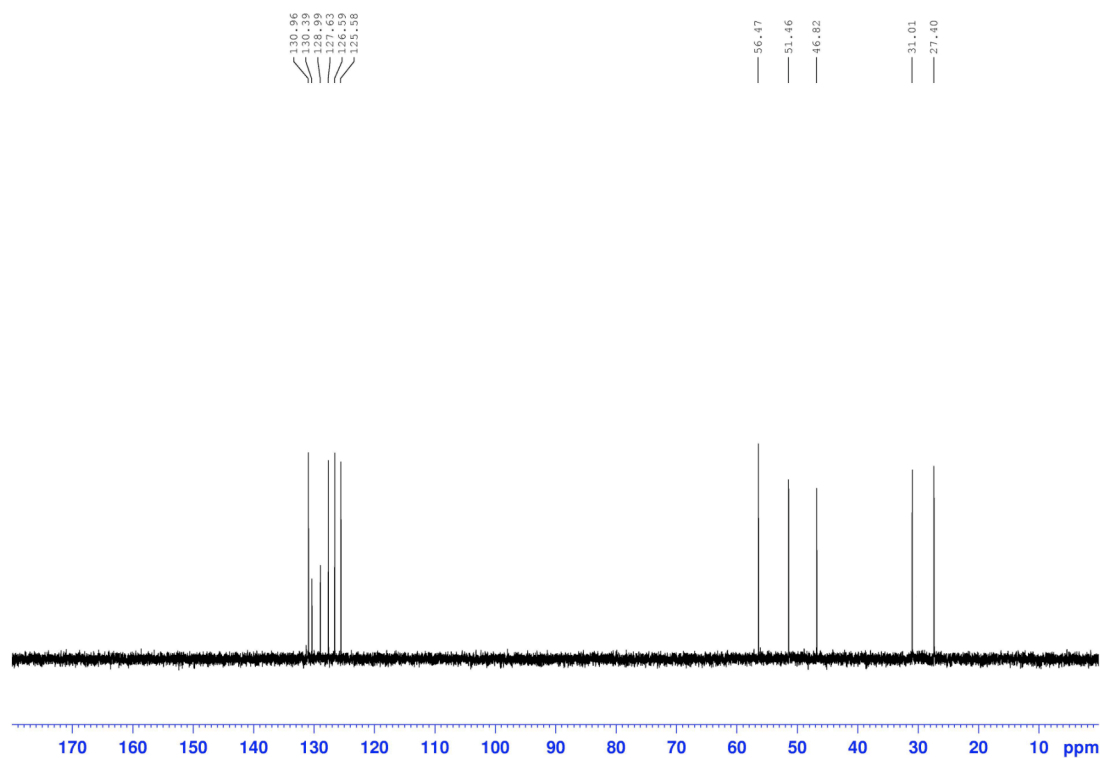

Supplement: c003050c.pdf [file c003050c.pdf]
